# Supplementary material
Source: HighWire-hosted journal article supplement (https://www.annfammed.org/highwire/filestream/7959/field_highwire_adjunct_files/2/Newman_Appendix_3.pdf)
Supplement: Newman_Appendix_3.pdf [file Newman_Appendix_3.pdf]

**Online Supplementary Material**

Newman RJ, Nichols DB, Cummings DM. Outpatient colonoscopy by rural family physicians. *Ann Fam Med.* 2005;3:122-125.

<http://www.annfammed.org/cgi/content/full/3/2/122/DC1>

**Supplemental Appendix 3. Patients Referred for Colorectal Surgery**

| Case | Lesion Size<br>cm | Location        | Pathology                                         | Procedure                        | Outcome               |
|------|-------------------|-----------------|---------------------------------------------------|----------------------------------|-----------------------|
| 1    | 4.5               | Cecum           | Adenocarcinoma                                    | Laparoscopic right hemicolectomy | Cure                  |
| 2    | 2.2               | Cecum           | Villous adenoma                                   | Laparoscopic right hemicolectomy | Cure                  |
| 3    | 4.0               | rectum          | High-grade invasive adenocarcinoma                | Local resection                  | Liver metastases      |
| 4    | 5.0               | Rectosigmoid    | Invasive moderately differentiated adenocarcinoma | Laparoscopic left hemicolectomy  | Liver metastases      |
| 5    | 3.0               | Rectum          | Villous adenoma                                   | Local resection                  | Cure                  |
| 6    | 2.0               | Ascending colon | Villous adenoma                                   | Laparoscopic right hemicolectomy | Cure                  |
| 7    | 3.0               | Cecum           | Moderately differentiated adenocarcinoma          | Laparoscopic right hemicolectomy | Cure                  |
| 8    | 10.0              | Hepatic flexure | Poorly differentiated adenocarcinoma              | Laparoscopic right hemicolectomy | 1 positive lymph node |
| 9    | 2.5               | Rectum          | Villous adenoma                                   | Local resection                  | Cure                  |
| 10   | 5.0               | Ascending colon | Villous adenoma with dysplasia                    | Laparoscopic right hemicolectomy | Cure                  |

Note: One additional patient had an 8-cm mass in the transverse colon that proved to be metastatic undifferentiated large-cell carcinoma of the lung. She was treated with palliative supportive care and died within weeks of her diagnosis.
